# Supplementary material
Source: Research Square preprint supplement (doi:10.21203/rs.3.rs-9025115/v1)
Supplement: Supplementary file 1 [file 4c709734dc98e4101e50b868.docx]

**A Microfluidic System for Particle Enrichment by Integrating an Acoustic Field with Oscillatory Flow**

Jing-Tong Na1, 2, Yan-Ran Wang3, Jia-Ming Zhao3, Shan-Shan Li4, Yong-Jiang Li2, Jun Yu2, Kai-Rong Qin2,

Shu-Xin Liu1, 2*, Chun-Dong Xue1, 2*

1*. Department of Nephrology, Central Hospital of Dalian University of Technology, Dalian 116033, China.*

2*. Faculty of Medicine, Dalian University of Technology, Dalian 116024, China.*

3*. School of Optoelectronic Engineering and Instrumentation Science, Dalian University of Technology,*

*Dalian 116024, China.*

4*. School of Locomotive and Rolling Stock Engineering, Dalian Jiaotong University, Dalian 116028, China.*

*Corresponding author’s email address：[root8848@sina.com; xuechundong@dlut.edu.cn](mailto:root8848@sina.com;%20xuechundong@dlut.edu.cn).

**Supplementary information**


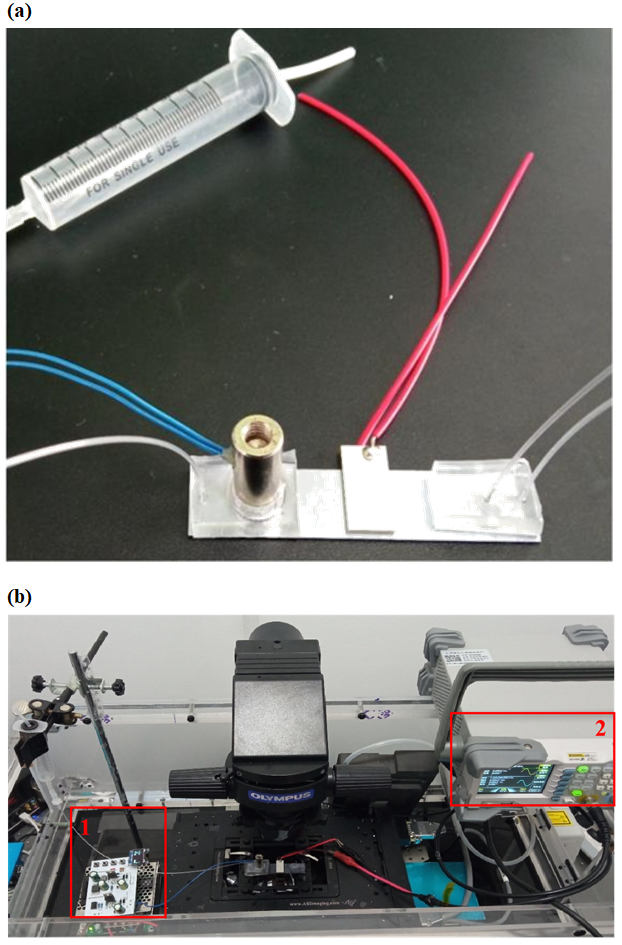


**Fig. S1.** Particle enrichment microfluidic system. (a) and (b) The real shot of the microfluidic chip, and the particle enrichment microfluidic system.


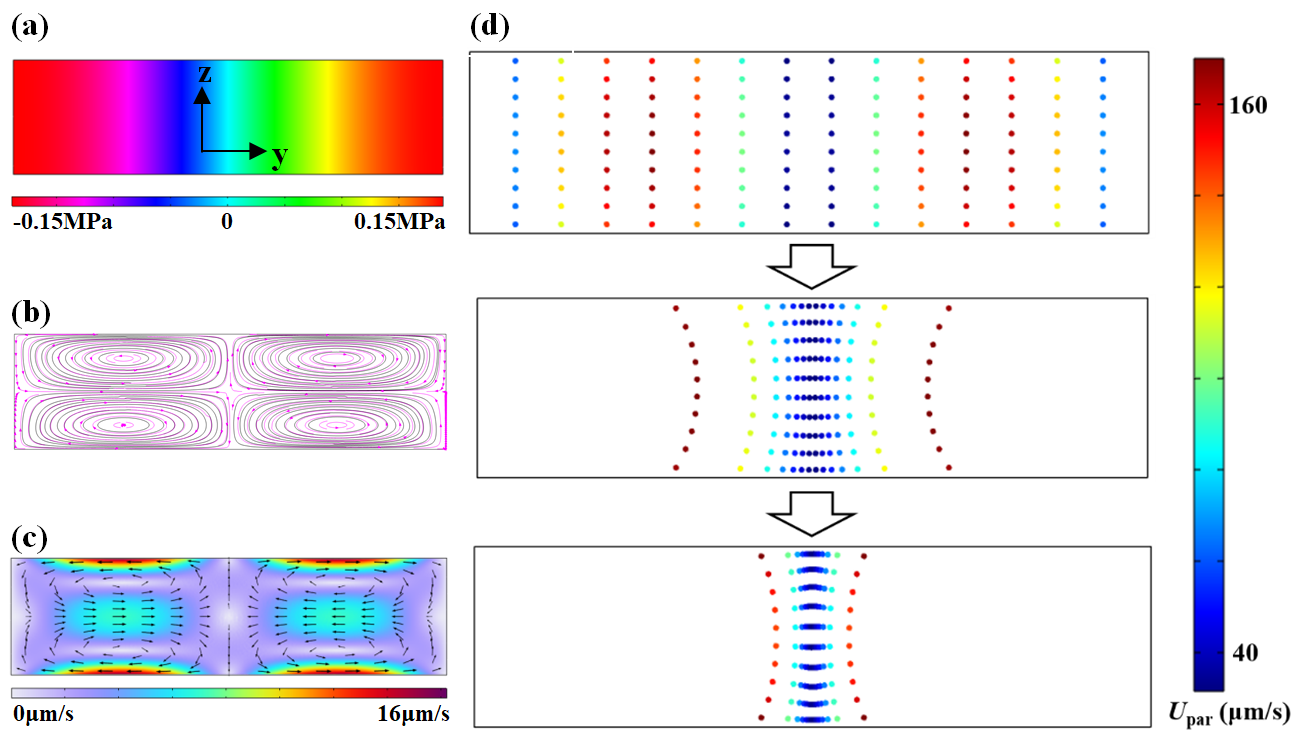


**Fig. S2.** Simulation analysis of the particle motion under the acoustic field effect. (a) Acoustic pressure distribution under acoustic standing waves. (b) and (c) the spatial distributions of both velocity magnitude and vectors under acoustic streaming effect. (d) Particles enrichment toward the central line of the channel cross-section under the acoustic field.
